# Supplementary material for: Crowdsourcing citation-screening in a mixed-studies systematic review: a feasibility study
Source: Springer Nature journal article supplement (doi:10.1186/s12874-021-01271-4), 2021-04-26
Supplement: MOESM4 [file 19110660]

**Cochrane Crowd and THIS Institute Survey  
May 2018**

**Question 1: Which of the following describes you (tick all that apply)?**

- I'm a student in a healthcare related area
- I'm a student in a non-healthcare related area
- I work in a healthcare related area
- I teach/train in a healthcare related area
- I'm a patient
- I'm a carer
- I'm retired
- I'm not any of these

**Question 2: What was main interest or motivation in signing up for this task?  
Please select all that apply and rank them in order of main motivation to lesser  
motivation/s.**

- Interest in this area of research
- The chance to get acknowledgement in a review
- The chance to get a certificate of involvement
- To do something good for a well-respected organisation
- It sounded fun/interesting
- Interest in systematic review production methods

**Question 3: Overall, did you enjoy it?**

- Yes
- No

**Question 4: How did you find it to screen abstracts for a particular topic?**

- Very easy
- Easy
- Neutral – neither easy nor difficult
- Difficult
- Very difficult

**Question 5: Did you find this task more or less interesting than Cochrane Crowd's  
standard RCT identification task?**

- Less interesting
- About the same
- More interesting
- Unsure

**Question 6: Did you find the highlighted words and phrases useful?**

- Yes
- No

**Question 7: Do you think the highlighted words and phrases influenced your  
decisions?**

- Yes
- No

**Question 8: What, if anything, would have improved the overall experience?**

**Question 9: Finally, a huge thank you for taking part and for completing this survey. Are there any other comments you'd like to make about the pilot task and how it went?**
